# Supplementary material
Source: Elsevier journal article supplement (https://www.sciencedirect.com/science/article/pii/S0211563819301154)
Supplement: mmc1 [file S0211563819301154:mmc1.docx]

**Verificación de la Declaración STROBE**

**(Lista de puntos esenciales que deben describirse en la publicación de estudios observacionales)**

La investigación es un ensayo clínico no aleatorizado, por tanto sin alcance experimental puro. Por esta razón no se aplicó el CONSORT.

| **Aspecto** | **Punto** | **Recomendación** | **Página** |
| --- | --- | --- | --- |
| **Título y Resumen** | 1 | (a) Indique, en el título o en el resumen, el diseño del estudio con un término habitual. | 1 |
| (b) Proporcione en el resumen una sinopsis informativa y equilibrada de lo que se ha hecho y lo que se ha encontrado. | 1 |
| **Introducción** |  |  |  |
| Contexto / fundamentos | 2 | Explique las razones y el fundamento científicos de la investigación que se comunica. | 3 |
| Objetivos | 3 | Indique los objetivos específicos, incluida cualquier hipótesis pre-especificada. | 4 |
| **Métodos** |  |  |  |
| Diseño del estudio | 4 | Presente al principio del documento los elementos clave del diseño del estudio. | 4 |
| Contexto | 5 | Describa el marco, los lugares y las fechas relevantes, incluido los períodos de reclutamiento, exposición, seguimiento y recogida de datos. | 4 |
| Participantes | 6 | (a) Estudios de cohortes: proporcione los criterios de elegibilidad, así como las fuentes y el método de selección de los participantes. Especifique los métodos de seguimiento. | No aplica |
| Estudios de casos y controles: proporcione los criterios de elegibilidad así como las fuentes y el proceso diagnóstico de los casos y el de selección de los controles. Proporcione las razones para la elección de casos y controles. | 4-5  Flujograma anexo |
| Estudios transversales: proporcione los criterios de elegibilidad y las fuentes y métodos de selección de los participantes. | No aplica |
| (b) Estudios de cohortes: en los estudios apareados, proporcione los criterios para la formación de parejas y el número de participantes con y sin exposición | No aplica |
| Estudios de casos y controles: en los estudios apareados, proporcione los criterios para la formación de las parejas y el número de controles por cada caso | No aplica |
| Variables | 7 | Defina claramente todas las variables: de respuesta, exposiciones, predictoras, confusoras y modificacoras del efecto. Si procede, proporcione los criterios diagnósticos. | 5 |
| Fuentes de datos/medidas | 8* | Para cada variable de interés, proporcione las fuentes de datos y los detalles de los métodos de valoración (medida). Si hubiera más de un grupo, especifique la comparabilidad de los procesos de medida. | 5-6 |
| Sesgos | 9 | Especifique todas las medidas adoptadas para afrontar fuentes potenciales de sesgo. | 6 |
| Tamaño muestral | 10 | Explique cómo se determinó el tamaño muestral | 4 |
| Variables cuantitativas | 11 | Explique cómo se trataron las variables cuantitativas en el análisis. Si procede, explique qué grupos se definieron y por qué. | 6 |
| Métodos estadísticos | 12 | (a) Especifique todos los métodos estadísticos, incluidos los empleados para controlar los factores de confusión | 6 |
| (b) Especifique todos los métodos utilizados para analizar subgrupos e interacciones | 7-8 |
| (c) Explique el tratamiento de los datos ausentes (missing data) | 4  Tablas 2 y 3 |
| (d) Estudio de cohortes: si procede, explique cómo se afrontan las pérdidas en el seguimiento | No aplica |
| Estudios de casos y controles: si procede, explique cómo se aparearon casos y controles | 10 |
| Estudios transversales: si procede, especifique cómo se tiene en cuenta en el análisis la estrategia de muestreo | No aplica |
| (e) Describa los análisis de sensibilidad | No aplica |
| **Resultados** |  |  |  |
| Participantes | 13* | (a) Describa el número de participantes en cada fase del estudio: cifras de los participantes potencialmente elegibles, los analizados para ser incluidos, los confirmados elegibles, los incluidos en el estudio, los que tuvieron un seguimiento completo y analizado. | 4  Flujograma anexo |
| (b) Describa las razones de la pérdida de participantes en cada fase. | Flujograma |
| (c) Considere el uso de un diagrama de flujo. | 4  Anexo |
| Datos descriptivos | 14* | (a) Describa las características de los participantes en el estudio (p. ej., demográficas, clínicas, sociales) y la información sobre las exposiciones y los posibles factores de confusión | 4  (Tablas 1 y 2) |
| (b) Indique el número de participantes con datos ausentes en cada variable de interés | Flujograma y tablas 1 y 2 |
| (c) Estudios de cohortes: resuma el período de seguimiento (p. ej., promedio y total) | No aplica |
| Datos de las variables de resultado | 15* | Estudios de cohortes: describa el número de eventos resultado, o bien proporcione medidas resumen a lo largo del tiempo | No aplica |
| Estudios de casos y controles: describa el número de participantes en cada categoría de exposición, o bien proporcione medidas resumen de exposición | Flujograma y tablas 1 y 2 |
| Estudios transversales: describa el número de eventos resultado, o bien proporcione medidas resumen | No aplica |
| Resultados principales | 16 | (a) Proporcione estimaciones no ajustadas y, si procede, ajustadas por factores de confusión, así como su precisión (p. ej., intervalos de confianza del 95%). Especifique los factores de confusión por los que se ajusta y las razones para incluirlos. | Tablas 3 y 4 |
| (b) Si categoriza variables continuas, describa los límites de los intervalos | No aplica |
| (c) Si fuera pertinente, valore acompañar las estimaciones del riesgo relativo con estimaciones del riesgo absoluto para un período de tiempo relevante. | No aplica |
| Otros análisis | 17 | Describa otros análisis efectuados (de subgrupos, interacciones o sensibilidad). | 7-8 |
| **Discusión** |  |  |  |
| Resultados clave | 18 | Resuma los resultados principales de los objetivos del estudio. | 8 |
| Limitaciones | 19 | Discuta las limitaciones del estudio, teniendo en cuenta posibles fuentes de sesgo o de imprecisión. Razone tanto sobre la dirección como sobre la magnitud de cualquier posible sesgo. | 10 |
| Interpretación | 20 | Proporcione una interpretación global prudente de los resultados considerando objetivos, limitaciones, multiplicidad de análisis, resultados de estudios similares y otras pruebas empíricas relevantes. | 8-10 |
| Generabilidad | 21 | Discuta la posibilidad de generalizar los resultados (validez externa). | 9-10 |
| **Otra información** |  |  |  |
| Financiación | 22 | Especifique la financiación y el papel de los patrocinadores del estudio y, si procede, del estudio previo en el que se basa el presente artículo. | 10 |
